# Supplementary material
Source: PubMed Central journal article supplement (PMC8212352)

## **Supplementary Materials and Methods**

### **Study design of animal experiments**

All animal experiments were performed with approval from the local animal experimental ethics committee and according to the government of Baden-Wuerttemberg/Tuebingen.

NOD.CB17-Prkdc<sup>scid</sup>/NcrCrl mice (Jackson laboratories) and C57BL6/J mice (Charles River) were maintained and bred at the animal facility of the University of Ulm in a pathogen-free environment (SPF IVC barrier) with a 14/10 day and night cycle as well as water and food ad libitum. All animal procedures were performed according to protocols approved by the state government of Baden-Wuerttemberg, Germany, following the animal welfare guidelines (Registration 1124 and 1128).

### **Cell line models:**

Murine A20 cells (TIP-208, ATCC) were cultured in RPMI 1640 supplemented 10% FBS, 1% Penicillin/Streptomycin and 50  $\mu$ M  $\beta$ -mercaptoethanol and maintained at a proliferation density of 1 million cells/ml. Ba/F3 were cultured in RPMI 1640 containing 10% FBS, 1% Penicillin/ Streptomycin and 10 ng/ml IL-3. The murine pre-B-cell line 300-19 was cultured in RPMI 1640 with 10% FBS, 1% L-glutamine, 1% Penicillin/Streptomycin, 1% non-essential amino acids, 1% sodium pyruvate and 50  $\mu$ M  $\beta$ -mercaptoethanol. HEK-293 T cells (CRL-3216, ATCC) used for lentiviral production and the M210B4 stromal cells used in co-culture experiments were cultured in DMEM with 10% FBS and 1% Penicillin/Streptomycin. JVM2 cells were cultured in RPMI medium with 10% FBS, 1% L-glutamine, 1% Penicillin/Streptomycin.

### **Primary CLL patient samples:**

Gene expression profiling was performed on RNA from 337 previously untreated CLL patient samples using Affymetrix Human Exon 1.0 ST Arrays. Data for core probe sets summarized on gene levels was normalized with the RMA algorithm from the aroma affymetrix package. Genomic aberrations were analyzed using FISH<sup>1</sup>. *IGHV* gene mutations status and gene mutations in *TP53*, *NOTCH1*, *SF3B1* were analyzed as previously described<sup>2</sup>. The analyses were conducted in accordance with the Declaration of Helsinki, approved by our institutional review board, and informed consent was obtained from all patients.

### In vivo drug treatments:

Linsitinib (OSI-906; Selleckchem) was administered at 25 mg/kg by oral gavage once daily buffered in 30% PEG 400 + 0.5% Tween 80 + Propylene glycol. GS-649443 (Gilead) was formulated in 10% (v/v) Ethanol + 20% (v/v) Cremophor EL + 70% (v/v) saline Solution (0.9% w/v) to achieve 1 mg/ml and treated BID with 5 mg/kg by oral gavage.

### Murine primary cells used in ex vivo and in vitro experiments

*Ex vivo* experiments were performed using viably frozen tumor cells stored in freezing medium with 45% FBS, 45% RPMI and 10% DMSO. The cells were thawed in RPMI containing 10% FBS. For functional studies viably frozen tumor cells from the 3<sup>rd</sup> or 4<sup>th</sup> transfers were used.

### In vitro drug treatments of murine primary cells

The GSK3 inhibitor (iGSK3) CHIR-99021 (Selleckchem) and the FOXO1 inhibitor (iFOXO1) AS1842856 (Calbiochem) were dissolved in DMSO to a stock concentration of 10mM. Viably frozen murine primary tumor cells from the 4<sup>th</sup> transfer were thawed and pre-treated with either iGSK3, iFOXO1 or with DMSO for 3 hours. After the pre-treatment time point, either iPI3K- $\delta$  or DMSO was added to each of the pre-treatment condition. The cells were further incubated for 12 hours after which RNA was isolated and expression changes in *Igf1r* was analyzed using RT-qPCR analysis.

### Cell proliferation assay (MTS assay):

Impact of inhibitors on cells *in vitro* was analyzed using the MTS cell proliferation assay. Briefly, 20,000 cells per well were seeded in triplicates on flat bottom 96 well plates (Nunc-Thermo Scientific). Serial dilutions of the inhibitors were added to make up for a total volume of 100 $\mu$ l per well. Individual plates were set up for the day 0, day 2 and day 4 timepoints and incubated at 37°C. At the specified timepoints, 20 $\mu$ l of CellTiter 96® AQueous one solution cell proliferation assay reagent (Promega) was added to each well and the plates were further incubated at 37°C for 3 hours. The OD was measured at 492nm using the Multiskan™ GO Microplate spectrophotometer (Thermo Scientific). The whole experiments were repeated three times.

### 5-bormodeoxyuridine (BrdU) incorporation assay

BrdU incorporation assay was performed according to the manufacturer's protocol (BD Pharmingen™ BrdU Flow Kit). In brief, mice were treated with 10mg/kg BrdU by intraperitoneal injection 1 hour before sacrifice. Approximately 5 million cells derived from a single cell suspension of the different organs were fixed in 70% ethanol. After washing, the cells were permeabilized and intracellular labeled with anti-BrdU and measured on BD LSRII analyzer.

### Pappenheim's panoptic staining

To perform the blood smear, 5µl of peripheral blood were taken and spread on microscopy slides. After drying, the smears were fixed in methanol for 10 min. Pappenheim method of panoptic staining was performed for 3 minutes and remaining solution washed off. Representative pictures were taken using a Zeiss microscope at 40X magnification.

### Immunocytochemistry

Cytospins were performed using 50,000 cells on Superfrost Menzel-Gläser slides (ThermoScientific) with Cytospin 4 (Thermo Scientific) at 1000rpm for 3 minutes. After spinning, cells were fixed in 2% ice-cold PFA for 10 minutes and rinsed twice with PBS. Permeabilization was made using 200µl of permeabilization solution (Triton X-100 0.5% in 1X PBS) for 30 minutes. After rinsing with PBS, the specimens were blocked in blocking buffer (5% goat serum albumin in PBS) for 1 hour. Each slide was incubated overnight at 4°C with 200µl of FOXO1 (C29H4) antibody (Cell Signaling), diluted 1:100 in antibody dilution buffer (1% BSA, 0.3% Triton X-100 in PBS). The slides were then incubated with 200µl of a 1:500 dilution of the secondary antibody (Cy3 goat anti-rabbit IgG (H+L) (life technologies) and incubated for 1h at room temperature in the dark. The slides were mounted using fluorescence mounting medium with DAPI (Vector Laboratories). The images were acquired using a Leica fluorescent microscope connected to Zeiss AxioCam camera.

### Analysis of whole exome sequencing

After alignment of paired-end reads (100 bp) to mm10 with bwa-mem (0.7.10), the alignment was sorted and duplicates were removed using Picard 1.64. After local realignment (GATK 3.2.2) and coverage calculation (bedtools 2.17.0., Suppl.Table 4) we performed variant calling (samtools0.1.19) and identified somatic and germline variants (SNVs and InDels)

using VarScan 2 (2.3.7). The variants were annotated using Annovar (release 22Mar2015) and filtered based on annotation. We focused on non-synonymous somatic mutations affecting exons or splicing sites, subsequently we removed low confidence calls (supported by less as 4 reads and variants not supported by reads mapping to both strands). In addition we filtered out calls, which have entry in Genomic SuperDups and dbSNP 138 annotation databases. Filtered high confidence calls were subjected to visual inspection in Integrative Genomics Viewer (IGV). Similar filtering pipeline was applied to germline calls and after pre-filtering we assessed the presence of cancer-relevant gene mutations (n=83) in germline.

### Analysis of pathways associated with mutated genes

The mutations identified exclusively in the GS-649443 resistant tumors were included to identify pathways associated with these genes. The Ingenuity pathway analysis (IPA) was used to identify signaling networks based on biological function of the enriched gene sets and relation to networks involved in diseases. Gene ontology analysis was performed using DAVID and biological processes implicated with the gene sets were analyzed. Protein-protein interactions were analyzed using STITCH analysis and related pathways were identified using the linked KEGG database search.

### shRNA and overexpression constructs

For knockdown of *GSK3B*, a set of 3 different shRNAs were obtained from the TRC lentiviral human shRNA library (GE Healthcare Dharmacon, RHS4533-EG2932; Suppl.Table 5) For overexpression of murine IGF1R, pcDNA3.1 with *Igf1r* ORF was obtained from Genscript (OMu20664C; Accession.No NM\_010513). The *Igf1r* ORF was shuttled into the SFLV-cDNA EGFP vector system.

### Lentiviral transduction

Production of virus has been performed as described using the lentiX lentiviral expression system (Clontech) following the manufacturer's instructions. For packaging the virus, a viral packaging vector (pAX2/GAG-Pol) and an envelope vector for the virus (pMD2/VSV-G) were used. Viruses harvested 24 and 48 hours after transfection were used for transduction of A20, Ba/F3 and 300-19 cells with 8mg/ml Polybrene. The cells were infected for 12 hours after which the virus was removed and the cells were allowed to recover for 2 days. Selection of transduced cells was performed by using 4µg/ml puromycin for A20 cells and 2µg/ml puromycin for Ba/F3 and 300-19 cells. Overexpression of *Igf1r* cloned in SFLV GFP vector

was performed on murine A20 cells as mentioned above however the transduced cells were selected by sorting for GFP expressing cells using BD FACS Aria II cell sorter.

#### B-cell receptor (BCR) stimulation using anti-IgM

Prior to BCR stimulation, the cells were cultured in RPMI 1640 medium with 0.5% cell culture grade BSA. The cells were then exposed to 10µg/ml anti-IgM polyclonal goat F(ab')<sub>2</sub> fragments to mouse IgM (for murine primary tumor cells, 300-19 or Ba/F3 cells) or 10µg/ml anti-IgG polyclonal goat F(ab')<sub>2</sub> fragments to mouse IgG for A20 cells (Jackson Immunoresearch). The cells were incubated for 10 minutes, washed with PBS and flash frozen with liquid nitrogen.

#### Protein extraction and Western Blotting

For total protein extraction, cells were lysed in RIPA buffer (150 mM sodium chloride, 1% IGEPAL CA-630, 0.5% sodium deoxycholate, 0.1% SDS, 50mM Tris pH 8.0) supplemented with 1mM DTT, 0.5mM PMSF and phosphatase inhibitor cocktail, for 60 min at 4°C. The amount of protein in each sample was quantified using the Protein Assay (Bio-rad). Equal concentrations of proteins were analyzed on 12% polyacrylamide gels or 4-12% Nu-Page pre-cast gels and subsequently transferred onto PVDF membranes. The primary antibodies used are mentioned in Suppl.Table 6. Images were acquired using the western gel documentation system.

#### Protein expression analysis using Simple Western™

For total protein extraction, cells were harvested cells in Cell Signaling Technology lysis buffer containing: Protease Inhibitor Cocktail (Roche Diagnostics Corp), and phosphatase inhibitor sets 1 and 2 (EMD Millipore). Following 30 minutes on ice, cell lysates were cleared by centrifugation at 12,500 rpm for 10 minutes at 4°C. The amount of protein in each sample was quantified using Pierce™ BCA assay kit (ThermoFisher). Lysates with equal concentrations of protein were analyzed by Simple Western technology using Peggy Sue™ or Sally Sue™ instruments (Suppl.Table 7, ProteinSimple, San Jose, CA). Data were processed using Compass software (ProteinSimple).

### Flow cytometric analysis

All antibodies which were used for flow cytometry are listed in Suppl. Table 8. Surface staining was performed in PBS containing 2% of FBS for 30 minutes at 4°C. After washing, samples were analyzed on a four-laser BD LSR II analyzer. FCS files were analyzed by using the FlowJo software version 7.

### DiOC6/PI staining for cell viability

Loss of mitochondrial transmembrane potential following drug treatment was assessed using DiOC6/PI staining and FACS. After treatment for 4 days with inhibitors, cells were stained with 45nM DiOC6 (Sigma Aldrich) in RPMI with 0.5% BSA for 20 minutes at 37°C. The cells were then stained with CD19-APC (eBioscience) for 20 minutes at room temperature. The cells were then centrifuged and resuspended in FACS staining buffer containing 2µg/ml PI and measured with FACS immediately. The CD19+ fraction within the DiOC6+ PI- population was evaluated.

### RNA extraction and expression analysis using RT-qPCR

Total RNA was isolated using RNeasy or DNA/RNA Allprep Kit (Qiagen) according to the manufacturer's instructions. RNA concentration was estimated using Nanodrop (Thermo scientific) and 400ng of RNA was reverse transcribed using the Reverse Transcription Kit (Promega). The cDNA was diluted 1:10 (for all genes) or 1:2 (for *Wt1*) prior to addition into the Q-PCR reaction mix. SybrGreen Supermix (Bio-rad) was used for the Q-PCR analysis as per the manufacturer's protocol. Fold differences in gene expression was analyzed using the  $\Delta\Delta$  Ct method by normalizing to control sets as mentioned in the figure legends. Table of primers is presented in Suppl. Table 9.

### **Quantification and statistical analyses:**

#### Statistical considerations

Statistical analyses were performed using Prism software version 6.0 (GraphPad). For non-normally distributed data sets the non-parametric Mann-Whitney U test was used. Categorical variables were compared using the two tailed Fisher's exact test. Dose response curves were compared using extra-sum-of-squares F test by including the best-fit parameters

such as using 95% confidence interval, LogIC50 and hillslope of the curves. Survival curves were analyzed using the log-rank-test (Mantel-Cox). Statistical significance was defined as  $P < 0.05$ . All exact P values are provided in the figure legend.

#### Image analysis of western blots:

Intensities of individual bands in western blots were analyzed using Fiji ImageJ densitometry software. Phosphorylation levels of proteins were expressed as a relative measure compared to that of the total protein and to their respective loading controls (ACTIN or LAMIN B).

#### Immunocytochemistry Image analysis:

Ten different fields were obtained per slide at 60X magnification with equal camera exposure and the overlay images were created with the DAPI nuclear stain to define nuclear and cytoplasmic localization of FOXO1. A blinded scoring of FOXO1 localization: as present in the nucleus, present in nucleus and cytoplasm, expressed only in nucleus or as not expressed was performed using Fiji ImageJ. FOXO1 localization in each sample was calculated from the average of the scores from the 10 fields and expressed as percentage of total number of cells per field.

#### References:

1. Döhner H, Stilgenbauer S, Benner A, et al. Genomic aberrations and survival in chronic lymphocytic leukemia. *N. Engl. J. Med.* 2000;343(26):1910–6.
2. Stilgenbauer S, Schnaiter A, Paschka P, et al. Gene mutations and treatment outcome in chronic lymphocytic leukemia: results from the CLL8 trial. *Blood.* 2014;123(21):3247–54.

## **Supplementary table legend**

**Suppl. Table 1.1:** Mutations with  $\geq 10\%$  TVF identified using whole exome sequencing of different tumor clones derived from mice treated with vehicle (iPI3K- $\delta$  sensitive tumors) across the different transfers (1<sup>st</sup> transfer N=1; 2<sup>nd</sup> transfer N=1; 3<sup>rd</sup> transfer N=2; 4<sup>th</sup> transfer N=3). The table represents acquired mutations in every single tumor.

**Suppl. Table 1.2:** Mutations with  $\geq 10\%$  TVF identified using whole exome sequencing of different tumors clones derived from mice treated with GS-649443 (iPI3K- $\delta$  resistant tumors) across the different transfers (3<sup>rd</sup> transfer N=2; 4<sup>th</sup> transfer N=4). The table represents acquired mutations in every single tumor.

**Suppl. Table 2.1:** Ingenuity Pathway analysis (IPA) predicts signalling networks which are associated with the mutated genes. Top significant pathway is the cellular movement, immune cell trafficking and inflammatory response.

**Suppl. Table 2.2:** Analysis of protein interactions using STITCH to identify pathways associated with the mutated genes. Pathway enrichments were identified from the linked KEGG pathway database.

**Suppl. Table 2.3:** Gene ontology enrichment analysis was performed using (DAVID) on mutations identified in resistant tumor cells. Biological processes associated with the mutated gene sets are listed in the table.

**Suppl. Table 3:** Characteristics of CLL patient cohort used for *in vitro* analysis. Sample #7 showed high mRNA expression but lower protein expression (Fig. 6E). All samples except sample #11 were derived from either untreated patients or those with chemo/chemo-immunotherapy. Sample #11 was derived from a patient treated with rituximab+idelalisib for 10 months.

**Suppl. Table 4:** Coverage statistics for whole exome sequencing (WES) of different tumor clones derived from mice treated with vehicle (iPI3K- $\delta$  sensitive tumors) across the different transfers (1<sup>st</sup> transfer N=1; 2<sup>nd</sup> transfer N=1; 3<sup>rd</sup> transfer N=2; 4<sup>th</sup> transfer N=3) and those treated with GS-649443 (iPI3K- $\delta$  resistant tumors) in all transfer rounds (3<sup>rd</sup> transfer N=2; 4<sup>th</sup> transfer N=4).

**Suppl. Table 5:** Human shRNA sequences for the knockdown of *GSK3B*.

**Suppl. Table 6:** List of antibodies used in Western Blot analysis.

**Suppl. Table 7:** Table of antibodies which have been used for Simple Western™ analysis.

**Suppl. Table 8:** Flow cytometry antibodies and the respective clones.



**Suppl. Table 9:** Sequences of forward and reverse primers used for RT-qPCR analysis.

**Suppl. Table 1.1**

| <b>Sensitive: 1st round Vh-1</b> |                    |            |
|----------------------------------|--------------------|------------|
| <b>Gene</b>                      | <b>Mutation</b>    | <b>TVF</b> |
| <i>2810417H13Rik</i>             | NM_026515: c.C214G | 15.79      |

| <b>Sensitive: 2nd round Vh-1</b> |                                |            |
|----------------------------------|--------------------------------|------------|
| <b>Gene</b>                      | <b>Mutation</b>                | <b>TVF</b> |
| <i>Wars</i>                      | NM_001164488: c.737+2T>C       | 21.69      |
| <i>Csnk1g1</i>                   | NM_173185: c.A398G             | 19.75      |
| <i>Xylt2</i>                     | NM_145828: c.2017_2017delinsC- | 17.5       |
| <i>Rtn3</i>                      | NM_001003933: c.A707C          | 17         |
| <i>Prkag3</i>                    | NM_153744: c.T527G             | 13.25      |
| <i>Pik3r5</i>                    | NM_177320: c.G1459C            | 10.71      |
| <i>Nedd1</i>                     | NM_008682: c.G1099A            | 20.78      |
| <i>Abca3</i>                     | NM_001039581: c.G3319A         | 15.69      |
| <i>Col6a1</i>                    | NM_009933: c.G2516A            | 10.13      |

| <b>Sensitive: 3rd round Vh-1</b> |                                |            |
|----------------------------------|--------------------------------|------------|
| <b>Gene</b>                      | <b>Mutation</b>                | <b>TVF</b> |
| <i>Abca3</i>                     | NM_001039581: c.G3319A         | 60         |
| <i>Prkag3</i>                    | NM_153744: c.T527G             | 50.56      |
| <i>Nedd1</i>                     | NM_008682: c.G1099A            | 48.03      |
| <i>Csnk1g1</i>                   | NM_173185: c.A398G             | 47.66      |
| <i>Rtn3</i>                      | NM_001003933: c.A707C          | 41.9       |
| <i>Parp11</i>                    | NM_181402: c.T560C             | 37.93      |
| <i>Vcan</i>                      | NM_019389: c.T2171G            | 30.88      |
| <i>Xylt2</i>                     | NM_145828: c.2017_2017delinsC- | 19.05      |
| <i>Vmn2r65</i>                   | NM_001105180: c.T1089G         | 16.13      |
| <i>Smc5</i>                      | NM_001252685: c.G3005A         | 8.97       |
| <i>Wars</i>                      | NM_001164488: c.737+2T>C       | 42.5       |
| <i>Klrb1b</i>                    | NM_030599: c.G289C             | 33.33      |
| <i>Klrb1b</i>                    | NM_030599: c.T275A             | 27.27      |
| <i>Slfn8</i>                     | NM_181545: c.G1669A            | 12.24      |
| <i>Itih2</i>                     | NM_010582: c.A1571C            | 11.76      |
| <i>Pabpc4</i>                    | NM_130881: c.C74A              | 11.76      |
| <i>Fam46d</i>                    | NM_001163104: c.A433G          | 8.75       |

| <b>Sensitive: 3rd round Vh-2</b> |                                  |            |
|----------------------------------|----------------------------------|------------|
| <b>Gene</b>                      | <b>Mutation</b>                  | <b>TVF</b> |
| <i>Abca3</i>                     | NM_001039581: c.G3319A           | 59.62      |
| <i>Wars</i>                      | NM_001164488: c.737+2T>C         | 52.94      |
| <i>Prkag3</i>                    | NM_153744: c.T527G               | 48.65      |
| <i>Vcan</i>                      | NM_019389: c.T2171G              | 47.44      |
| <i>Rtn3</i>                      | NM_001003933: c.A707C            | 39.68      |
| <i>Ttn</i>                       | NM_028004: c.A43832G             | 12.1       |
| <i>Tnk2</i>                      | NM_001289443: c.G1078A           | 50         |
| <i>Nedd1</i>                     | NM_008682: c.G1099A              | 46.85      |
| <i>Csnk1g1</i>                   | NM_173185: c.A398G               | 44.74      |
| <i>Parp11</i>                    | NM_181402: c.T560C               | 42.25      |
| <i>AY761185</i>                  | NM_001012640: c.G102C            | 37.75      |
| <i>Slfn8</i>                     | NM_181545: c.1975_1975delinsAGA- | 19.23      |
| <i>Xylt2</i>                     | NM_145828: c.2017_2017delinsC-   | 12.5       |

**Sensitive: 4th round Vh-1**

| Gene            | Mutation                               | TVF   |
|-----------------|----------------------------------------|-------|
| <i>Rtn3</i>     | NM_001003933: c.A707C                  | 42.11 |
| <i>Vcan</i>     | NM_019389: c.T2171G                    | 39.86 |
| <i>Vmn2r65</i>  | NM_001105180: c.T1089G                 | 13.82 |
| <i>Syne1</i>    | NM_153399: c.T2795C                    | 10.92 |
| <i>Clec14a</i>  | NM_025809: c.A1074T                    | 10.28 |
| <i>Tnk2</i>     | NM_001289443: c.G1078A                 | 58.82 |
| <i>Cntn3</i>    | NM_008779: c.G1303A                    | 44.44 |
| <i>Abca3</i>    | NM_001039581: c.G3319A                 | 44    |
| <i>Prkag3</i>   | NM_153744: c.T527G                     | 43.1  |
| <i>Parp11</i>   | NM_181402: c.T560C                     | 38.1  |
| <i>Nedd1</i>    | NM_008682: c.G1099A                    | 35.79 |
| <i>Csnk1g1</i>  | NM_173185: c.A398G                     | 34.78 |
| <i>Wars</i>     | NM_001164488: c.737+2T>C               | 31.82 |
| <i>Kmt2c</i>    | NM_001081383:<br>c.7198_7198delinsGAG- | 11.69 |
| <i>Traf3ip3</i> | NM_153137: c.491-2A>TCTC-              | 10    |

**Sensitive: 4th round Vh-2**

| Gene           | Mutation                       | TVF   |
|----------------|--------------------------------|-------|
| <i>Prkag3</i>  | NM_153744: c.T527G             | 30.43 |
| <i>Xylt2</i>   | NM_145828: c.2017_2017delinsC- | 15.87 |
| <i>Vmn2r65</i> | NM_001105180: c.T1089G         | 13.71 |
| <i>Tnk2</i>    | NM_001289443: c.G1078A         | 62.26 |
| <i>Vcan</i>    | NM_019389: c.T2171G            | 47.92 |
| <i>Csnk1g1</i> | NM_173185: c.A398G             | 47.52 |
| <i>Abca3</i>   | NM_001039581: c.G3319A         | 46.97 |
| <i>Nedd1</i>   | NM_008682: c.G1099A            | 46.43 |
| <i>Rtn3</i>    | NM_001003933: c.A707C          | 45.81 |
| <i>Wars</i>    | NM_001164488: c.737+2T>C       | 44.03 |
| <i>Kcnc4</i>   | NM_145922: c.A247G             | 28    |

**Sensitive: 4th round Vh-3**

| Gene                 | Mutation                         | TVF   |
|----------------------|----------------------------------|-------|
| <i>Tnk2</i>          | NM_001289443: c.G1078A           | 51.02 |
| <i>Csnk1g1</i>       | NM_173185: c.A398G               | 47.37 |
| <i>Nedd1</i>         | NM_008682: c.G1099A              | 39    |
| <i>Rtn3</i>          | NM_001003933: c.A707C            | 38.71 |
| <i>Parp11</i>        | NM_181402: c.T560C               | 38.46 |
| <i>Tanc2</i>         | NM_181071: c.A2638G              | 18.69 |
| <i>Abca3</i>         | NM_001039581: c.G3319A           | 57.14 |
| <i>AY761185</i>      | NM_001012640: c.G102C            | 45.51 |
| <i>Prkag3</i>        | NM_153744: c.T527G               | 42.55 |
| <i>Wars</i>          | NM_001164488: c.737+2T>C         | 40.7  |
| <i>Vcan</i>          | NM_019389: c.T2171G              | 40.65 |
| <i>Sfn8</i>          | NM_181545: c.1975_1975delinsAGA- | 24    |
| <i>Katna1</i>        | NM_011835: c.A1286G              | 16.92 |
| <i>Nhlrc2</i>        | NM_025811: c.T211C               | 12.04 |
| <i>Krt81</i>         | NM_001166157: c.A347C            | 11.74 |
| <i>2410002F23Rik</i> | NM_025880: c.763_764insAACA      | 10    |

**Suppl. Table 1.2**

| Resistant: 3rd round I-5 |                                |       |
|--------------------------|--------------------------------|-------|
| Gene                     | Mutation                       | TVF   |
| <b>Grb2</b>              | NM_008163 c.67dupG             | 82.35 |
| <i>Rtn3</i>              | NM_001003933: c.A707C          | 44.12 |
| <i>Baz2b</i>             | NM_001001182: c.T998G          | 36.36 |
| <i>Irak1bp1</i>          | NM_001168240: c.A528C          | 30.86 |
| <i>Usp17lb</i>           | NM_201409: c.A259C             | 30.68 |
| <i>Mpdz</i>              | NM_001305284: c.T2965C         | 26.58 |
| <i>Chrna7</i>            | NM_007390: c.1294_1294delinsC- | 23.28 |
| <i>Ttn</i>               | NM_028004: c.A43832G           | 12.81 |
| <i>2410002F23Rik</i>     | NM_025880: c.760_761insAGATA   | 10.59 |
| <i>Csnk1g1</i>           | NM_173185: c.A398G             | 50.62 |
| <i>Nedd1</i>             | NM_008682: c.G1099A            | 45.04 |
| <i>Vcan</i>              | NM_019389: c.T2171G            | 42.33 |
| <i>Parp11</i>            | NM_181402: c.T560C             | 31.46 |
| <i>Xirp2</i>             | NM_001024618: c.A8851G         | 13.54 |

| Resistant: 3rd round I-6 |                                       |       |
|--------------------------|---------------------------------------|-------|
| Gene                     | Mutation                              | TVF   |
| <i>Abca3</i>             | NM_001039581: c.G3319A                | 63.22 |
| <i>Csnk1g1</i>           | NM_173185: c.A398G                    | 49.16 |
| <i>Prkag3</i>            | NM_153744: c.T527G                    | 48.39 |
| <i>Parp11</i>            | NM_181402: c.T560C                    | 47.17 |
| <i>Nedd1</i>             | NM_008682: c.G1099A                   | 46.75 |
| <i>Vcan</i>              | NM_019389: c.T2171G                   | 46.55 |
| <i>Rtn3</i>              | NM_001003933: c.A707C                 | 45.5  |
| <i>Cd44</i>              | NM_001039151: c.G943A                 | 44.66 |
| <i>AY761185</i>          | NM_001012640: c.G102C                 | 43.16 |
| <i>Slc39a12</i>          | NM_001012305: c.T466C                 | 43.01 |
| <i>Fat1</i>              | NM_001081286: c.A4220G                | 41.18 |
| <i>Morc2b</i>            | NM_177719: c.C1976T                   | 39.86 |
| <i>Myct1</i>             | NM_026793: c.T46G                     | 37.89 |
| <i>Prkd1</i>             | NM_008858: c.T605C                    | 37.57 |
| <i>Ccp110</i>            | NM_182995: c.A3007C                   | 37.31 |
| <i>Klh129</i>            | NM_001164493: c.A35G                  | 37.25 |
| <i>Osbpl1a</i>           | NM_207530: c.A1133G                   | 29.61 |
| <b>Ptk2</b>              | NM_007982: c.G1603A                   | 27.49 |
| <i>Slfm8</i>             | NM_181545: c.1975_1975delinsAGA-      | 26.67 |
| <i>Amy2b</i>             | NM_001190404: c.C604T                 | 24.05 |
| <i>2410002F23Rik</i>     | NM_025880: c.763_764insAACA           | 15.74 |
| <i>2410002F23Rik</i>     | NM_025880: c.760_761insAGATA          | 15.24 |
| <i>Clpx</i>              | NM_001044389: c.9_10insTGCGGCGCTGTACC | 10.67 |

| Resistant: 4th round I-1 |                          |       |
|--------------------------|--------------------------|-------|
| Gene                     | Mutation                 | TVF   |
| <i>Abca3</i>             | NM_001039581: c.G3319A   | 53.61 |
| <i>Vcan</i>              | NM_019389: c.T2171G      | 50.31 |
| <i>Wars</i>              | NM_001164488: c.737+2T>C | 49.59 |
| <i>Nedd1</i>             | NM_008682: c.G1099A      | 44.77 |
| <i>Rtn3</i>              | NM_001003933: c.A707C    | 41.62 |
| <i>Csnk1g1</i>           | NM_173185: c.A398G       | 41.61 |
| <i>Lypd8</i>             | NM_027339: c.A405C       | 37.59 |
| <i>Hrh1</i>              | NM_001252642: c.T353C    | 35.61 |
| <i>Mylk</i>              | NM_139300: c.C53T        | 32.28 |
| <i>Ddhd1</i>             | NM_001039106: c.T755C    | 30.61 |
| <i>Prkag3</i>            | NM_153744: c.T527G       | 28.26 |
| <i>Elp3</i>              | NM_001253812: c.C857T    | 25    |
| <i>Rps12</i>             | NM_011295: c.G358A       | 23.98 |
| <i>Gabra4</i>            | NM_010251: c.G191A       | 23.32 |
| <i>Gc</i>                | NM_008096: c.T11G        | 23.23 |
| <i>Cyp19a1</i>           | NM_007810: c.A20C        | 21.36 |
| <i>Epb4.1b3</i>          | NM_013813: c.A44G        | 21.25 |
| <i>Plce1</i>             | NM_019588: c.A5912C      | 20.69 |
| <i>Klhl29</i>            | NM_001164493: c.A35G     | 20    |
| <i>Fat3</i>              | NM_001080814: c.C3513G   | 19.61 |
| <i>Mboat1</i>            | NM_153546: c.T811G       | 19.31 |
| <i>Crim1</i>             | NM_015800: c.A1241G      | 18.08 |
| <i>Tubal3</i>            | NM_001033879: c.A890C    | 17.83 |
| <i>Anks4b</i>            | NM_028085: c.C416T       | 17.43 |
| <i>B4galnt3</i>          | NM_198884: c.G2942A      | 16.19 |
| <i>Siglec1</i>           | NM_011426: c.444dupC     | 15.38 |
| <i>Itga1</i>             | NM_001033228: c.A3175C   | 14.58 |
| <i>Pcdh18</i>            | NM_130448: c.C1735T      | 13.88 |
| <i>Tshb</i>              | NM_001165940: c.T315G    | 12.36 |
| <i>Clca4b</i>            | NM_001033199: c.G1417A   | 11.99 |
| <i>Foxp2</i>             | NM_053242: c.1766+2T>G   | 10.71 |

| Resistant: 4th round I-2 |                                        |       |
|--------------------------|----------------------------------------|-------|
| Gene                     | Mutation                               | TVF   |
| <i>Vcan</i>              | NM_019389: c.T2171G                    | 49.28 |
| <i>Csnk1g1</i>           | NM_173185: c.A398G                     | 48.18 |
| <i>Parp11</i>            | NM_181402: c.T560C                     | 46.38 |
| <i>Rtn3</i>              | NM_001003933: c.A707C                  | 45.63 |
| <i>Abca3</i>             | NM_001039581: c.G3319A                 | 45.28 |
| <i>Pramel1</i>           | NM_031377: c.T1145C                    | 39.53 |
| <i>Wars</i>              | NM_001164488: c.737+2T>C               | 37.25 |
| <i>B230219D22Rik</i>     | NM_181278: c.A8C                       | 33.33 |
| <i>Gpc5</i>              | NM_175500: c.A1580C                    | 32.41 |
| <i>Srfbp1</i>            | NM_026040: c.A1000C                    | 30    |
| <i>Clpx</i>              | NM_001044389: c.9_10insTGCGGCGCTTGTACC | 13.33 |

**Resistant: 4th round I-3**

| Gene                 | Mutation                         | TVF   |
|----------------------|----------------------------------|-------|
| <i>Abca3</i>         | NM_001039581: c.G3319A           | 59.04 |
| <i>Prkag3</i>        | NM_153744: c.T527G               | 56.9  |
| <i>Tnk2</i>          | NM_001289443: c.G1078A           | 55.77 |
| <i>Csnk1g1</i>       | NM_173185: c.A398G               | 54.17 |
| <i>Nedd1</i>         | NM_008682: c.G1099A              | 45.67 |
| <i>Wars</i>          | NM_001164488: c.737+2T>C         | 45.54 |
| <i>Vcan</i>          | NM_019389: c.T2171G              | 44.83 |
| <i>Parp11</i>        | NM_181402: c.T560C               | 39.73 |
| <i>Rtn3</i>          | NM_001003933: c.A707C            | 38.59 |
| <i>Sned1</i>         | NM_172463: c.T2111G              | 36.47 |
| <i>Ddhd1</i>         | NM_001039106: c.T755C            | 33.33 |
| <i>Fat3</i>          | NM_001080814: c.C3513G           | 32.73 |
| <i>Pcdh18</i>        | NM_130448: c.C1735T              | 30.17 |
| <i>Fat3</i>          | NM_001080814: c.T3568G           | 29.24 |
| <i>Gdf10</i>         | NM_145741: c.C1421T              | 26.21 |
| <i>Rps12</i>         | NM_011295: c.G358A               | 24.34 |
| <i>Clca4b</i>        | NM_001033199: c.G1417A           | 23.71 |
| <i>Mboat1</i>        | NM_153546: c.T811G               | 23.56 |
| <i>Elp3</i>          | NM_001253812: c.C857T            | 23.08 |
| <i>Siglec1</i>       | NM_011426: c.444dupC             | 22.89 |
| <i>Eml5</i>          | NM_001081191: c.G2357A           | 22.69 |
| <i>Anks4b</i>        | NM_028085: c.C416T               | 22.68 |
| <i>Sfn8</i>          | NM_181545: c.1975_1975delinsAGA- | 22.58 |
| <i>B4galnt3</i>      | NM_198884: c.G2942A              | 22.09 |
| <i>Ccdc106</i>       | NM_146178: c.T422G               | 20.48 |
| <i>Itga1</i>         | NM_001033228: c.A3175C           | 20.25 |
| <i>Tmem132e</i>      | NM_001304439: c.T1007G           | 16.85 |
| <i>Tuba3</i>         | NM_001033879: c.A890C            | 16.28 |
| <i>Gc</i>            | NM_008096: c.T11G                | 15.71 |
| <i>Hrh1</i>          | NM_001252642: c.T353C            | 14.29 |
| <i>Plce1</i>         | NM_019588: c.A5912C              | 13.99 |
| <i>Mylk</i>          | NM_139300: c.C53T                | 13.46 |
| <i>Lypd8</i>         | NM_027339: c.A405C               | 11.76 |
| <i>Calcoco2</i>      | NM_001271018: c.T938A            | 10.85 |
| <i>4930407110Rik</i> | NM_001166475: c.A3406C           | 10.62 |

**Resistant: 4th round I-4**

| Gene             | Mutation                       | TVF   |
|------------------|--------------------------------|-------|
| <i>Csnk1g1</i>   | NM_173185: c.A398G             | 47.71 |
| <i>Abca3</i>     | NM_001039581: c.G3319A         | 44.55 |
| <i>Vcan</i>      | NM_019389: c.T2171G            | 44.22 |
| <i>Nedd1</i>     | NM_008682: c.G1099A            | 44.2  |
| <i>Rtn3</i>      | NM_001003933: c.A707C          | 42.77 |
| <i>AY761185</i>  | NM_001012640: c.G102C          | 40.15 |
| <i>Wars</i>      | NM_001164488: c.737+2T>C       | 39.42 |
| <i>Parp11</i>    | NM_181402: c.T560C             | 37.17 |
| <i>Klhl9</i>     | NM_172871: c.A1370C            | 34.13 |
| <i>Chpt1</i>     | NM_001146690: c.T572C          | 31.5  |
| <i>Dnah10</i>    | NM_019536: c.A7880G            | 30.28 |
| <i>Enc1</i>      | NM_007930: c.A1055G            | 25.84 |
| <i>Il2</i>       | NM_008366: c.141_141delinsGCA- | 21.43 |
| <b>Grb2</b>      | NM_008163: c.T421C             | 20.99 |
| <i>Arhgef10l</i> | NM_001112722: c.G347A          | 13.79 |
| <i>Kdm6a</i>     | NM_009483: c.A4271C            | 12.56 |
| <i>Xirp2</i>     | NM_001024618: c.A8851G         | 11.43 |
| <i>Ttn</i>       | NM_028004: c.A43832G           | 10.48 |
| <i>Dock5</i>     | NM_177780: c.1815_1815delinsA- | 10.08 |
| <i>Ednra</i>     | NM_010332: c.C964T             | 10.05 |
| <i>Adcy9</i>     | NM_009624: c.G1148A            | 10    |

## Suppl. Table 2.1: Signaling networks associated with the mutated genes (Ingenuity pathway analysis)

| ID | Molecules in Network                                                              | Score | Focus Molecules | Top Diseases and Functions                                                                   |
|----|-----------------------------------------------------------------------------------|-------|-----------------|----------------------------------------------------------------------------------------------|
| 1  | CD44, CHRNA7, CYP19A1, DOCK5, ENC1, GC, ITGA1, MYLK, PLCE1, PTK2, SIGLEC1         | 21    | 11              | Cellular Movement, Immune Cell Trafficking, Inflammatory Response                            |
| 2  | ANKS4B, CCDC106, CCP110, DNAH10, FAT3, GABRA4, GPC5, PCDH18, RPS12, SNED1, SRFBP1 | 21    | 11              | Lipid Metabolism, Small Molecule Biochemistry, Organismal Development                        |
| 3  | ARHGEF10L, B4GALNT3, BAZ2B, CHPT1, CLCA4, CRIM1, DDHD1, Foxp2, MYCT1, OSBPL1A     | 21    | 11              | Molecular Transport, Gene Expression, Behavior                                               |
| 4  | ADCY9, EDNRA, PTK2, GDF10, IL2, MPDZ, PRKD1, SLC39A12, TSHB                       | 17    | 9               | Cell-To-Cell Signaling and Interaction, Cell-mediated Immune Response, Cellular Development  |
| 5  | CLPX, ELP3, EML5, GRB2, HRH1, IRAK1BP1, KDM6A                                     | 12    | 7               | Carbohydrate Metabolism, Small Molecule Biochemistry, Dermatological Diseases and Conditions |
| 6  | FAT1, KLHL29, MBOAT1, TUBAL3, XIRP2                                               | 10    | 6               | Post-Translational Modification, Cellular Function and Maintenance, Developmental Disorder   |

## Suppl. Table 2.2

### Pathways associated with the mutated genes (STITCH)

| # ID | Pathway description                     | Observed gene count | FDR      | Matching genes in the network (labels)                           |
|------|-----------------------------------------|---------------------|----------|------------------------------------------------------------------|
| 5205 | Proteoglycans in cancer                 | 10                  | 4.52E-07 | <i>Cbl, Cd44, Egfr, Frs2, Gab1, Grb2, Plce1, Ptk2, Pxn, Sos1</i> |
| 4012 | ErbB signaling pathway                  | 7                   | 1.16E-06 | <i>Cbl, Egfr, Gab1, Grb2, Ptk2, Shc1, Sos1</i>                   |
| 4510 | Focal adhesion                          | 9                   | 1.47E-06 | <i>Bcar1, Egfr, Grb2, Itga1, Mylk, Ptk2, Pxn, Shc1, Sos1</i>     |
| 5100 | Bacterial invasion of epithelial cells  | 6                   | 9.18E-06 | <i>Bcar1, Cbl, Gab1, Ptk2, Pxn, Shc1</i>                         |
| 4020 | Calcium signaling pathway               | 7                   | 6.49E-05 | <i>Adcy9, Chrna7, Ednra, Egfr, Hrh1, Mylk, Plce1</i>             |
| 4062 | Chemokine signaling pathway             | 7                   | 6.49E-05 | <i>Adcy9, Bcar1, Grb2, Ptk2, Pxn, Shc1, Sos1</i>                 |
| 5220 | Chronic myeloid leukemia                | 5                   | 0.00011  | <i>Cbl, Gab2, Grb2, Shc1, Sos1</i>                               |
| 4810 | Regulation of actin cytoskeleton        | 7                   | 0.000155 | <i>Bcar1, Egfr, Itga1, Mylk, Ptk2, Pxn, Sos1</i>                 |
| 5206 | MicroRNAs in cancer                     | 6                   | 0.000155 | <i>Cd44, Egfr, Grb2, Shc1, Sos1, Spry2</i>                       |
| 4014 | Ras signaling pathway                   | 7                   | 0.000169 | <i>Egfr, Gab1, Gab2, Grb2, Plce1, Shc1, Sos1</i>                 |
| 4540 | Gap junction                            | 5                   | 0.000193 | <i>Adcy9, Egfr, Grb2, Sos1, Tubal3</i>                           |
| 4915 | Estrogen signaling pathway              | 5                   | 0.000273 | <i>Adcy9, Egfr, Grb2, Shc1, Sos1</i>                             |
| 4722 | Neurotrophin signaling pathway          | 5                   | 0.000716 | <i>Frs2, Gab1, Grb2, Shc1, Sos1</i>                              |
| 5214 | Glioma                                  | 4                   | 0.000716 | <i>Egfr, Grb2, Shc1, Sos1</i>                                    |
| 4320 | Dorso-ventral axis formation            | 3                   | 0.000823 | <i>Egfr, Grb2, Sos1</i>                                          |
| 4912 | GnRH signaling pathway                  | 4                   | 0.00262  | <i>Adcy9, Egfr, Grb2, Sos1</i>                                   |
| 4015 | Rap1 signaling pathway                  | 5                   | 0.00843  | <i>Adcy9, Bcar1, Egfr, Plce1, Prkd1</i>                          |
| 5213 | Endometrial cancer                      | 3                   | 0.00869  | <i>Egfr, Grb2, Sos1</i>                                          |
| 5223 | Non-small cell lung cancer              | 3                   | 0.00974  | <i>Egfr, Grb2, Sos1</i>                                          |
| 4910 | Insulin signaling pathway               | 4                   | 0.0125   | <i>Cbl, Grb2, Shc1, Sos1</i>                                     |
| 5211 | Renal cell carcinoma                    | 3                   | 0.0145   | <i>Gab1, Grb2, Sos1</i>                                          |
| 4630 | Jak-STAT signaling pathway              | 4                   | 0.0164   | <i>Cbl, Grb2, Sos1, Spry2</i>                                    |
| 4664 | Fc epsilon RI signaling pathway         | 3                   | 0.0164   | <i>Gab2, Grb2, Sos1</i>                                          |
| 4917 | Prolactin signaling pathway             | 3                   | 0.0193   | <i>Grb2, Shc1, Sos1</i>                                          |
| 4080 | Neuroactive ligand-receptor interaction | 5                   | 0.0211   | <i>Chrna7, Ednra, Gabra4, Hrh1, Tshb</i>                         |
| 5215 | Prostate cancer                         | 3                   | 0.0292   | <i>Egfr, Grb2, Sos1</i>                                          |
| 5200 | Pathways in cancer                      | 5                   | 0.0343   | <i>Cbl, Egfr, Grb2, Ptk2, Sos1</i>                               |
| 4151 | PI3K-Akt signaling pathway              | 5                   | 0.0429   | <i>Egfr, Grb2, Itga1, Ptk2, Sos1</i>                             |
| 4660 | T cell receptor signaling pathway       | 3                   | 0.0429   | <i>Cbl, Grb2, Sos1</i>                                           |

### Suppl. Table 2.3

#### Biological processes associated with the gene mutations (DAVID)

| No. | GO Term    | Biological process                                                       | Count | %      | P-Value | Fold Enrichment | FDR    |
|-----|------------|--------------------------------------------------------------------------|-------|--------|---------|-----------------|--------|
| 1.  | GO:0007155 | cell adhesion                                                            | 7     | 11.290 | 0.0021  | 5.117           | 2.918  |
| 2.  | GO:0007265 | Ras protein signal transduction                                          | 3     | 4.838  | 0.0074  | 22.630          | 9.992  |
| 3.  | GO:0000187 | activation of MAPK activity                                              | 3     | 4.838  | 0.0187  | 13.995          | 23.304 |
| 4.  | GO:0050728 | negative regulation of inflammatory response                             | 3     | 4.838  | 0.0241  | 12.225          | 29.006 |
| 5.  | GO:0001764 | neuron migration                                                         | 3     | 4.838  | 0.0461  | 8.577           | 48.436 |
| 6.  | GO:0048010 | vascular endothelial growth factor receptor signaling pathway            | 2     | 3.225  | 0.0669  | 28.363          | 62.130 |
| 7.  | GO:0007205 | protein kinase C-activating G-protein coupled receptor signaling pathway | 2     | 3.225  | 0.0746  | 25.324          | 66.299 |
| 8.  | GO:0007156 | homophilic cell adhesion via plasma membrane adhesion molecules          | 3     | 4.838  | 0.0747  | 6.525           | 66.324 |
| 9.  | GO:0051928 | positive regulation of calcium ion transport                             | 2     | 3.225  | 0.0797  | 23.636          | 68.820 |
| 10. | GO:0007399 | nervous system development                                               | 4     | 6.451  | 0.0860  | 3.761           | 71.680 |
| 11. | GO:0001934 | positive regulation of protein phosphorylation                           | 3     | 4.838  | 0.0918  | 5.780           | 74.108 |

### Suppl. Table 3

#### Characteristics of CLL patient cohort used for *in vitro* analysis

| Sample | Sex    | Age | IGHV  | TP53 | FISH                       | Previous/current Therapies                                  | IGF1R mRNA expression |
|--------|--------|-----|-------|------|----------------------------|-------------------------------------------------------------|-----------------------|
| #1     | female | 69  | Mut   | n.a. | normal                     | Untreated                                                   | Low                   |
| #2     | female | 54  | Mut   | WT   | 13q-                       | Untreated                                                   | Low                   |
| #3     | male   | 65  | Mut   | n.a. | 13q-                       | Untreated                                                   | Low                   |
| #4     | male   | 61  | Unmut | WT   | trisomy 12, 14q-, t(14;18) | Chemo-immunotherapy                                         | Low                   |
| #5     | male   | 64  | Unmut | n.a. | 13q14.3                    | Untreated                                                   | Low                   |
| #6     | male   | 49  | Unmut | n.a. | 13q-                       | Chemo-immunotherapy                                         | Low                   |
| #7     | female | 70  | Mut   | WT   | 13q-                       | Untreated                                                   | High                  |
| #8     | male   | 55  | Unmut | n.a. | 13q-                       | Untreated                                                   | High                  |
| #9     | male   | 71  | Mut   | Mut  | normal                     | Chemo-immunotherapy                                         | High                  |
| #10    | male   | 76  | Mut   | n.a. | 13q-                       | Chemotherapy                                                | High                  |
| #11    | female | 69  | n.a.  | n.a. | 13q-, 17p-                 | Prior: Chemo-immunotherapy<br>Current: Rituximab+Idelalisib | High                  |
| #12    | male   | 48  | Mut   | n.a. | normal                     | Chemo-immunotherapy                                         | High                  |



**Suppl. Table 4****Coverage statistics for exome sequencing**

| File name            | bp on target [%] | Average Coverage | No Coverage | 1x Coverage | 10x Coverage | 15x Coverage | 50x Coverage | 120x Coverage | 200x Coverage |
|----------------------|------------------|------------------|-------------|-------------|--------------|--------------|--------------|---------------|---------------|
| TCL1-192 tumor 1     | 47.56            | 126.929          | 0.13        | 99.87       | 99.05        | 98.17        | 82.10        | 49.03         | 38.52         |
| TCL1-192 tumor 2     | 49.28            | 174.777          | 0.14        | 99.86       | 99.14        | 98.52        | 89.00        | 65.89         | 56.59         |
| Sens: 1st round Vh-1 | 38.91            | 85.9038          | 0.14        | 99.86       | 98.60        | 97.08        | 69.83        | 29.13         | 19.88         |
| Sens: 2nd round Vh-1 | 42.90            | 80.9129          | 0.15        | 99.85       | 98.20        | 96.21        | 65.02        | 25.85         | 17.69         |
| Sens: 3rd round Vh-1 | 49.64            | 119.011          | 0.22        | 99.78       | 98.26        | 96.92        | 77.97        | 45.32         | 35.53         |
| Sens: 3rd round Vh-2 | 40.02            | 111.973          | 0.12        | 99.88       | 99.33        | 98.76        | 87.17        | 36.63         | 6.92          |
| Sens: 4th round Vh-1 | 47.51            | 124.91           | 0.11        | 99.89       | 99.37        | 98.83        | 88.05        | 56.44         | 43.36         |
| Sens: 4th round Vh-2 | 44.75            | 128.207          | 0.12        | 99.88       | 99.35        | 98.85        | 89.29        | 59.28         | 46.07         |
| Sens: 4th round Vh-3 | 39.01            | 100.156          | 0.12        | 99.88       | 99.17        | 98.45        | 83.49        | 42.25         | 27.88         |
| Res: 3rd round I-5   | 505.10           | 118.079          | 0.18        | 99.82       | 97.45        | 94.64        | 71.44        | 47.93         | 39.93         |
| Res: 3rd round I-6   | 505.10           | 118.079          | 0.18        | 99.82       | 97.45        | 94.64        | 71.44        | 47.93         | 39.93         |
| Res: 4th round I-1   | 48.06            | 153.051          | 0.12        | 99.88       | 99.47        | 99.09        | 91.88        | 68.82         | 57.83         |
| Res: 4th round I-2   | 40.11            | 107.214          | 0.14        | 99.86       | 99.26        | 98.62        | 84.93        | 46.20         | 32.14         |
| Res: 4th round I-3   | 43.09            | 131.326          | 0.13        | 99.87       | 99.40        | 98.93        | 89.61        | 47.37         | 13.67         |
| Res: 4th round I-4   | 47.22            | 156.366          | 0.12        | 99.88       | 99.46        | 99.06        | 92.00        | 58.45         | 23.34         |

**Suppl. Table 5****shRNA sequences for the knockdown of GSK3B**

| Target gene   | Clone ID       | Mature Antisense 5' to 3' |
|---------------|----------------|---------------------------|
| GSK3B shRNA 1 | TRCN0000010551 | TCTTTCAAACGTGACCAGTG      |
| GSK3B shRNA 2 | TRCN0000010552 | TTTCTACCAACTGATCCACAC     |
| GSK3B shRNA 3 | TRCN0000000822 | TTTGGTAGTTTGACATTTGGG     |

**Suppl. Table 6****List of antibodies which have been used in Western blot analysis**

| Antibody                | Catalog Number       | Molecular weight [kDa]     | 2 <sup>nd</sup> antibody | Dilution of stock | Incubation time |
|-------------------------|----------------------|----------------------------|--------------------------|-------------------|-----------------|
| p-IGF1R                 | #3021 CST            | 95                         | rabbit                   | 1:500             | Over night 4°C  |
| IGF1R                   | #9750 CST            | 95                         | rabbit                   | 1:500             | Over night 4°C  |
| p-AKT <sup>Thr308</sup> | #4056 CST            | 60                         | rabbit                   | 1:500             | Over night 4°C  |
| AKT                     | #9272 CST            | 60                         | rabbit                   | 1:1000            | Over night 4°C  |
| p-ERK (E-4)             | # sc-7383 Santa Cruz | 44 → p-ERK1<br>42 → p-ERK2 | mouse                    | 1:1000            | Over night 4°C  |
| ERK1/2 (K-23)           | #sc-94 Santa Cruz    | 44                         | rabbit                   | 1:1000            | Over night 4°C  |
| LAMIN B (C-20)          | #sc-6216 Santa Cruz  | 67                         | goat                     | 1:500             | Over night 4°C  |
| β-ACTIN                 | #sc-1615 Santa Cruz  | 42                         | goat                     | 1:500             | Over night 4°C  |
| P-FOXO                  | #9461 CST            | 82                         | rabbit                   | 1:500             | Over night 4°C  |
| FOXO                    | #2880 CST            | 80                         | rabbit                   | 1:500             | Over night 4°C  |

In 5% BSA + TBS-T 0.1%

## Suppl. Table 7

### List of antibodies which have been used in Simple Western™ analysis

| Antibody                    | Catalog number                  | Molecular Weight [kDa]           | 2 <sup>nd</sup> antibody | Dilution of stock                             | Incubation time |
|-----------------------------|---------------------------------|----------------------------------|--------------------------|-----------------------------------------------|-----------------|
| IGF1R                       | #3027 CS                        | 95                               | rabbit                   | 1:50<br>In ProteinSimple antibody diluent II  | 30 minutes      |
| p-AKT <sup>Ser473</sup>     | #4058 CS                        | 60                               | rabbit                   | 1:25<br>In ProteinSimple antibody diluent II  | 30 minutes      |
| AKT                         | #2920 CS                        | 60                               | rabbit                   | 1:100<br>In ProteinSimple antibody diluent II | 30 minutes      |
| p-ERK <sup>Tyr202/204</sup> | #9101 CS                        | 44 →<br>p-ERK1<br>42 →<br>p-ERK2 | rabbit                   | 1:50<br>In ProteinSimple antibody diluent II  | 30 minutes      |
| ERK1/2                      | #9102 CS                        | 44 →<br>ERK1<br>42 →<br>ERK2     | rabbit                   | 1:100<br>In ProteinSimple antibody diluent II | 30 minutes      |
| PI3K-α                      | #4255 CS                        | 110                              | rabbit                   | 1:50<br>In ProteinSimple antibody diluent II  | 30 minutes      |
| PI3K-β                      | #3011 CS                        | 110                              | rabbit                   | 1:100<br>In ProteinSimple antibody diluent II | 30 minutes      |
| PI3K-δ                      | #sc-7176<br>Santa Cruz          | 110                              | rabbit                   | 1:100<br>In ProteinSimple antibody diluent II | 30 minutes      |
| PI3K-γ                      | #ABD-026L<br>Jena<br>Bioscience | 110                              | mouse                    | 1:50<br>In ProteinSimple antibody diluent II  | 30 minutes      |
| β-ACTIN                     | #4968 CS                        | 45                               | rabbit                   | 1:250<br>In ProteinSimple antibody diluent II | 30 minutes      |

**Suppl. Table 8****Flow cytometry antibodies and respective clones**

| Antibody                                 | Clone   | Cat. Nr.   | Vendor      |
|------------------------------------------|---------|------------|-------------|
| Anti-Mouse CD5 PE                        | 53-7-3  | 12-0051-82 | eBioscience |
| Anti-Mouse CD19 APC                      | eBio1D3 | 17-0193-82 | eBioscience |
| Anti-Mouse CD45.2 Alexa Fluor 700        | 104     | 56-0454-82 | eBioscience |
| Anti-Mouse CD3 Pacific Blue              | 17A2    | 100214     | BioLegend   |
| Anti-Mouse CD11b PE-Cyanine7             | M1/70   | 25-0112-82 | eBioscience |
| Anti-Hu/Mo CD45R (B220) PerCP-Cyanine5.5 | RA3-6B2 | 45-0452-82 | eBioscience |
| Anti-Mouse CD45.1 APC/Cy7                | A20     | 110716     | BioLegend   |

**Suppl. Table 9**

**Primers for gene expression analysis using RT-qPCR analysis**

| Species | Target gene      | Forward primer<br>5' - 3' | Reverse primer<br>5' - 3' |
|---------|------------------|---------------------------|---------------------------|
| mouse   | <i>Ak4</i>       | AAAGGATCGCCCAGAACTTT      | GCCACGTCACCAACTTCC        |
| mouse   | <i>Angt2</i>     | ACATGCACCGTGAACGAG        | TGATGAGTCAATTGTCTGGTAGG   |
| mouse   | <i>bFGF</i>      | CGGCTCTACTGCAAGAACG       | TGCTTGGAGTTGTAGTTTGACG    |
| mouse   | <i>Brca1</i>     | TTGAGACACGCGCTTAACCT      | ATCAAGTTCAGTGTCTCCATTCT   |
| mouse   | <i>Brca2</i>     | GAAGGAAGCACTGAGATTTGC     | ACACCGCTGTGTTGTGTCTT      |
| mouse   | <i>Cdkn3</i>     | GATGAAGAACAGACTCCAATTCAA  | AACCTGGAAGAGCACATAAACC    |
| mouse   | <i>Erb2ip</i>    | GTTCTCACTATGGCAGCTCTAGG   | GACTGGATGTCTGCGGATG       |
| mouse   | <i>Igf1r</i>     | GAGAATTCCTTCACAATTCCAT    | CACTTGCATGACGTCTCTCC      |
| mouse   | <i>Pdgfa</i>     | CACCAGCAGCGTCAAGTG        | TTCCTGACATACTCCACTTTGG    |
| mouse   | <i>Pdgfb</i>     | CTGTGATCGAGAATGGCTACG     | CAGCAATTTCTACATCTCCCAGT   |
| mouse   | <i>Rabl5</i>     | ATTCGAGCTCTGGGACTGTG      | CCATGAGCATCCTTCATCAG      |
| mouse   | <i>Rasgrp3</i>   | TGCACCGATGGTATTTATCCT     | CTCCACTGGCATTCCGATAC      |
| mouse   | <i>Rna Pol</i>   | CATCAACCAGGTGGTACAGC      | GATTCTGGAACCAACTCTCC      |
| mouse   | <i>Tec</i>       | ATTGAATATCACAAGCACAATGC   | CCCTTTGACTGACCGGGTA       |
| mouse   | <i>Tnfawp8/1</i> | AACTGAAGGCTTGACACATCC     | GGCTCTTCGTGCTGAAGGT       |
| mouse   | <i>Ube2e3</i>    | GGAGCTAGCAGAGATAACCCTTG   | ATCTCCTTTAGGCCAGCAC       |
| mouse   | <i>Wt1</i>       | CAGATGAACCTAGGAGCTACCTAAA | TCTGCCCTTCTGTCCATTTT      |
| human   | <i>Igf1R</i>     | TTCAGCGCTGCTGATGTG        | AAGTCCCGGCTCATGGT         |
| human   | <i>RPL19</i>     | ATCGATCGCCAGATGTATCA      | GCGTGCTTCCTTGGTCTTAG      |
| human   | <i>Gsk3β</i>     | GACATTTACCTCAGGAGTGC      | GTTAGTCGGGCAGTTGGTGT      |
| human   | <i>Foxo1</i>     | GTGGGGCAACCTGTCGTA        | TTCTCGGCTGAGCTCTCG        |
| human   | <i>Foxo3</i>     | GCTAAGCAGGCCTCATCTCA      | TTCCGTCAGTTTGAGGGTCT      |
| human   | <i>Foxo4</i>     | ACGAGTGGATGGTCCGACT       | GTGGCGGATCGAGTTCTTC       |

Suppl. Figure 1

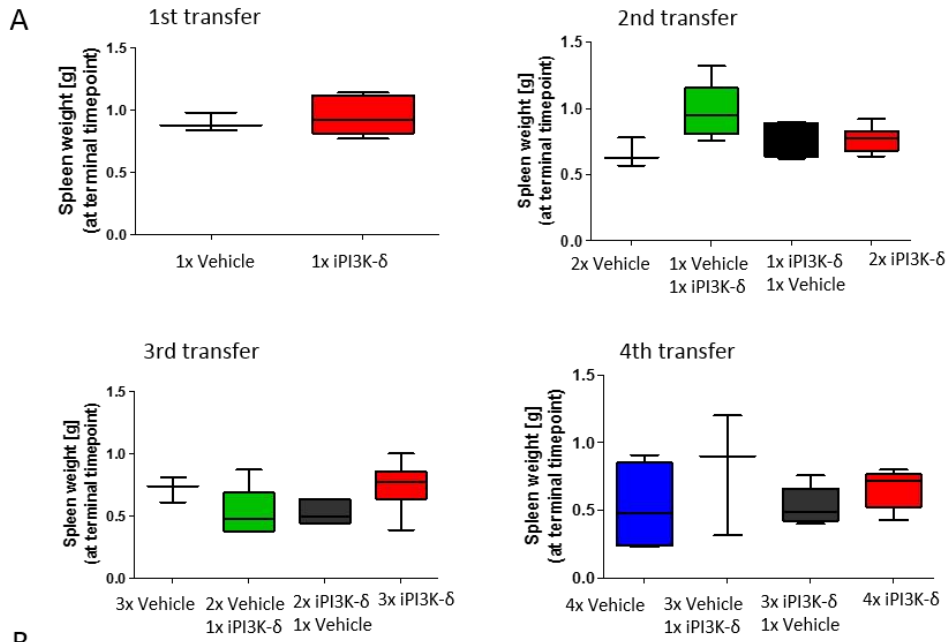

**B**

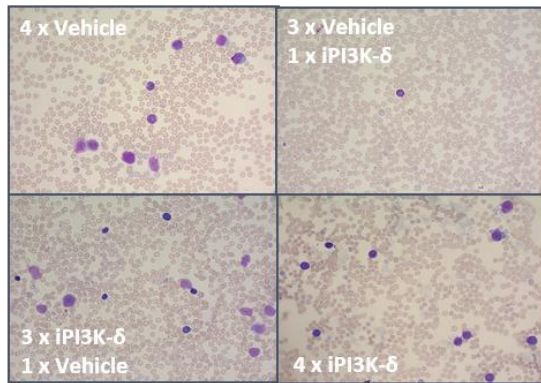

**C**

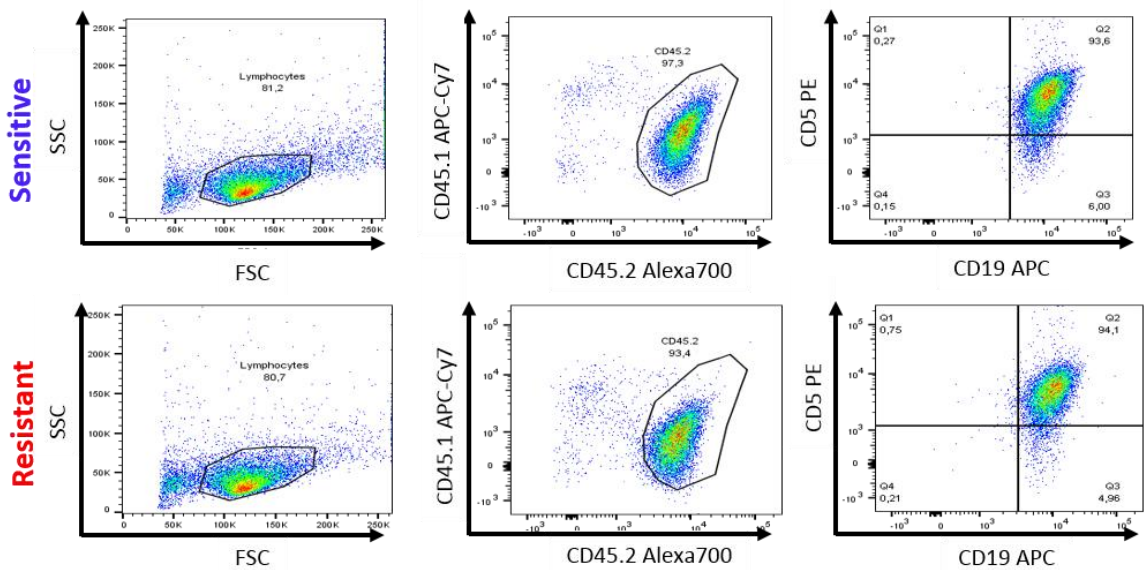

### **Suppl. Fig. 1**

(A) Spleen weights at the terminal time point (Fig 2A, 2B) of mice in the different treatment groups. Similar spleen weights between the different treatment groups, indicate that all mice became critically sick because of an increase in tumor burden at the terminal time point.

(B) Representative blood smears of mice from the 4<sup>th</sup> transfer that were sacrificed after 5 days of treatment start. The groups included mice which received tumors that were previously treated with the vehicle (3X vehicle) or inhibitor (3X inhibitor) in the previous transfers. Subsequently, the mice were treated with either vehicle or GS-649443 in the 4<sup>th</sup> round for 5 days.

(C) Representative FACS blots showing CLL tumor cell marker expression of CD19 and CD5 in sensitive and resistant cells. Cells of sensitive and resistant mice display similar morphologies.

Suppl. Figure 2

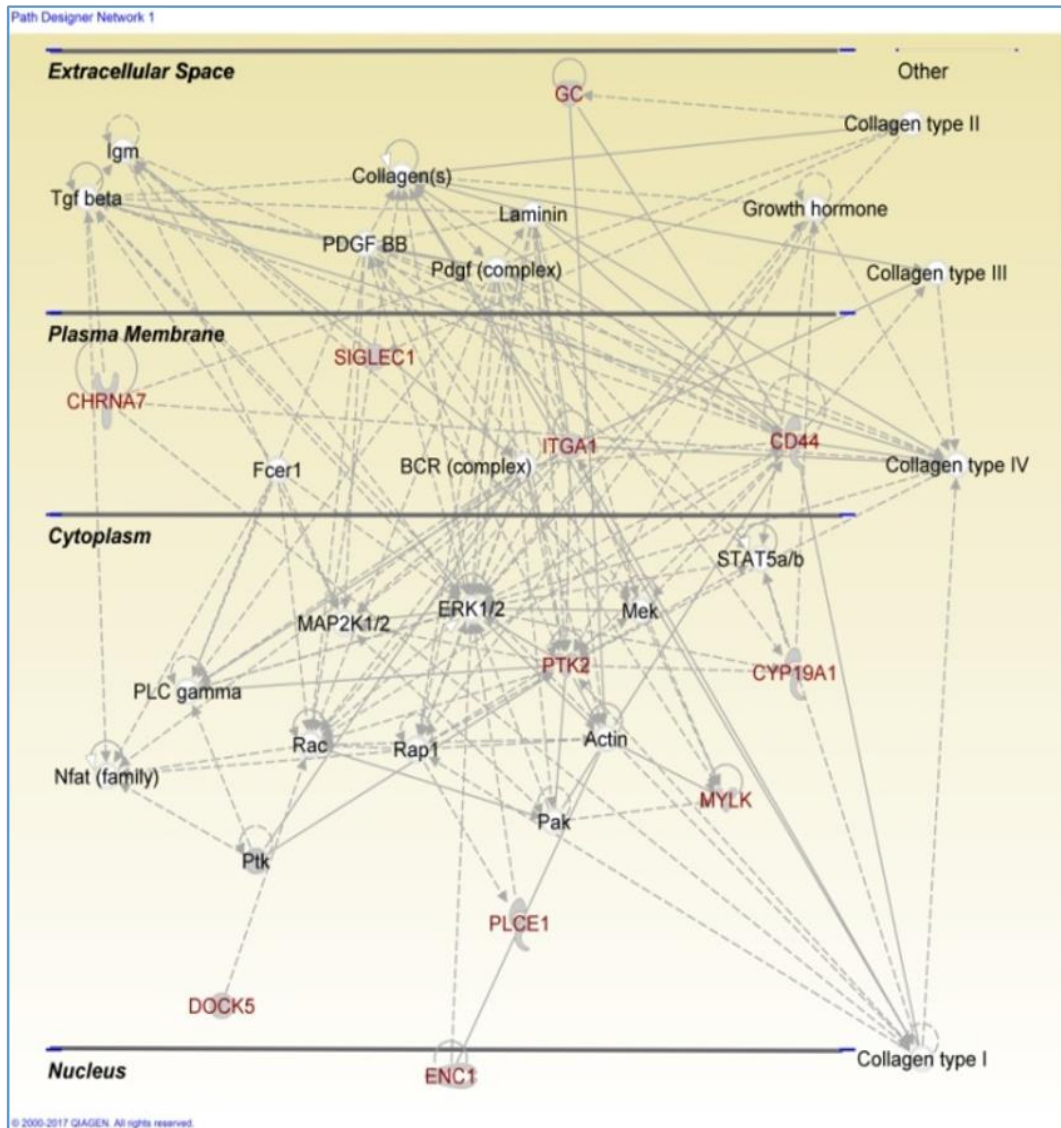

**Suppl. Fig. 2**

Pathway generated using Ingenuity Pathway Analysis (IPA) from mutated genes identified in the resistant tumor cell clones. The pathway corresponds to the top enriched functional network namely, cellular movement, immune cell trafficking and inflammatory response (Suppl. Table 2.1).



Suppl. Figure 3

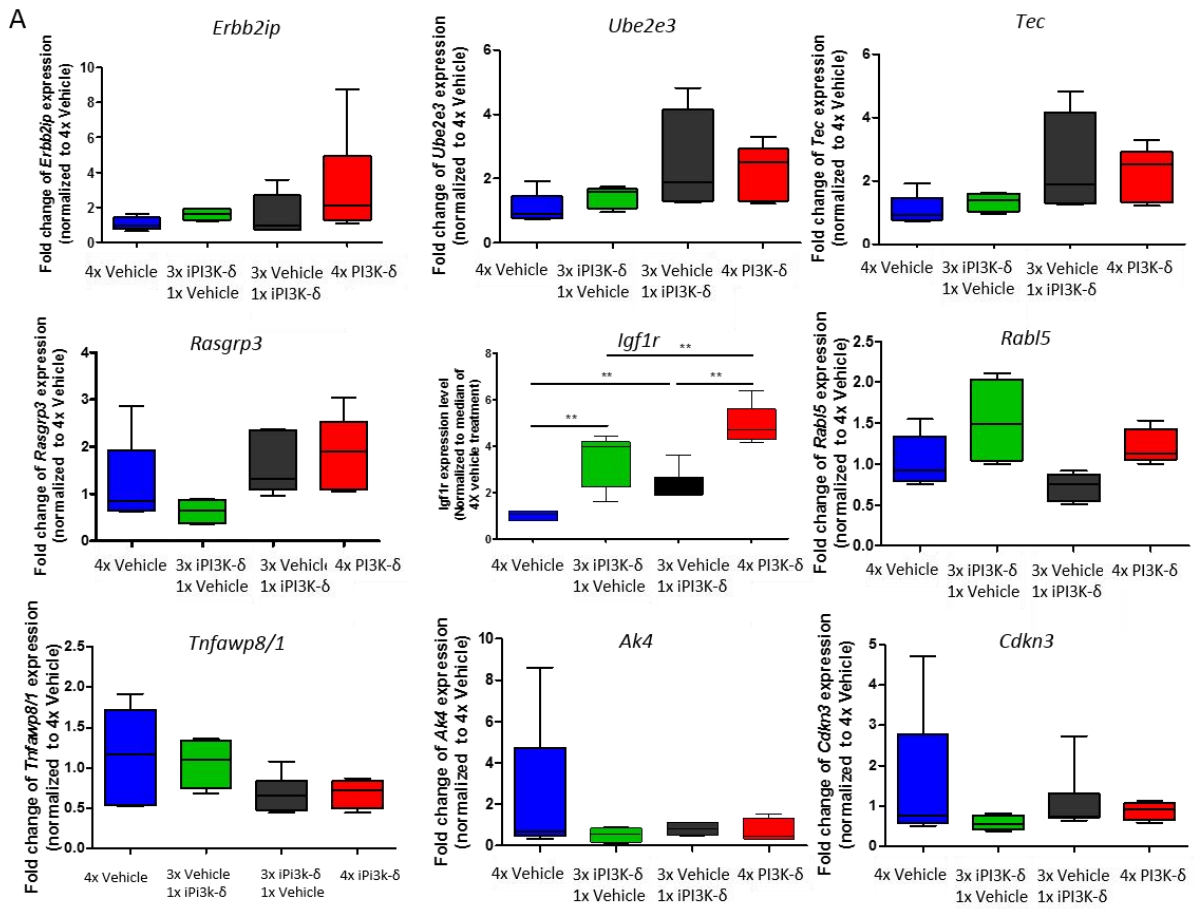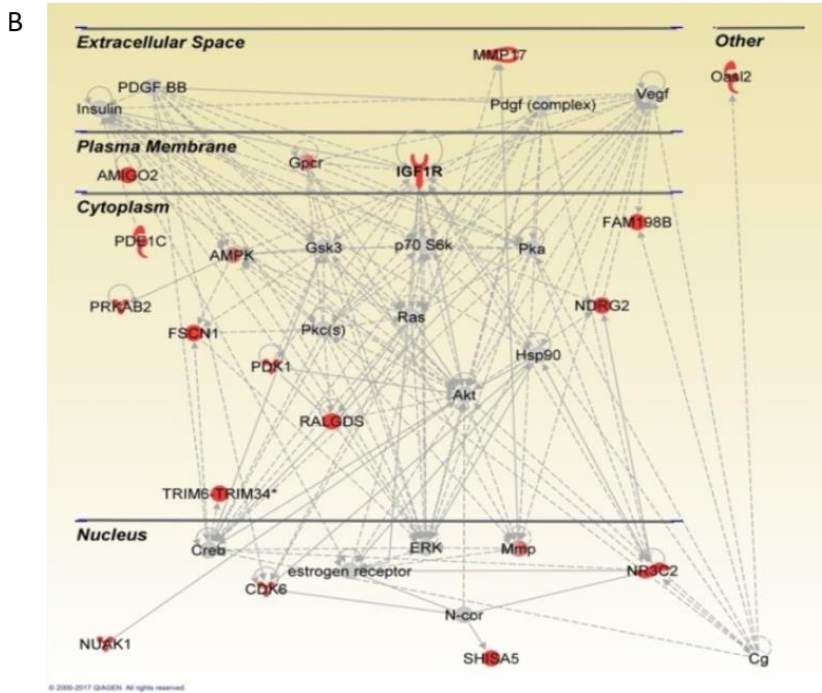

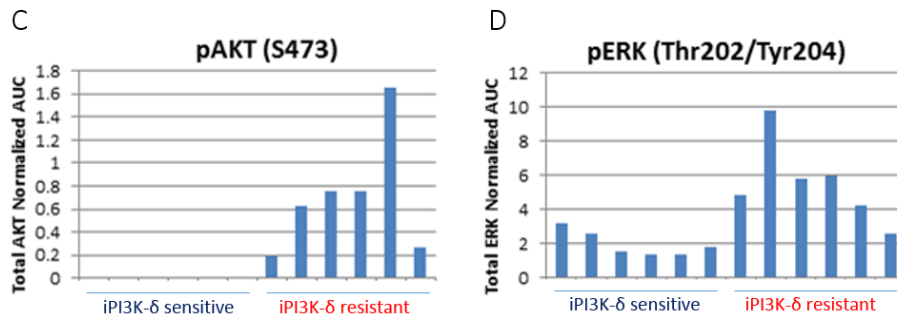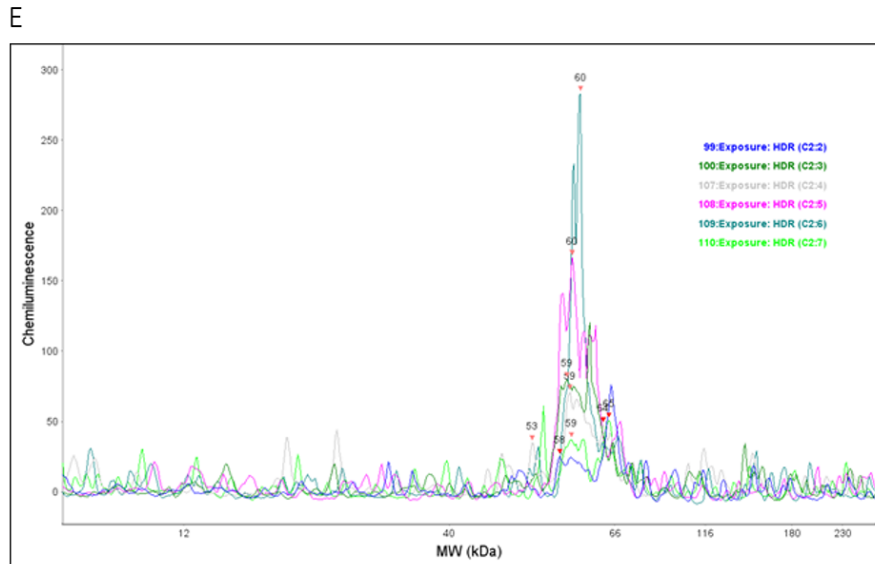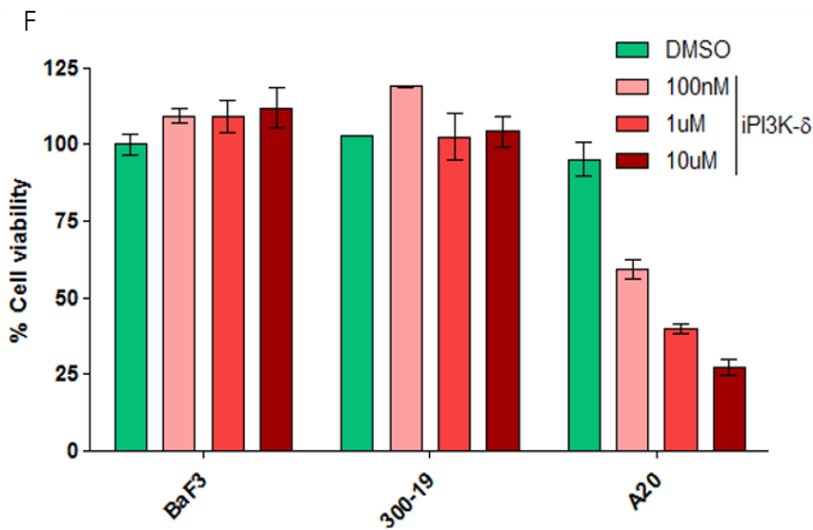

### Suppl. Figure 3

(A) RT-qPCR validation of the genes identified with RNAseq to be differentially expressed in the PI3K- $\delta$  inhibitor resistant tumor cells in comparison to sensitive tumor cells. Tumors obtained from the 4<sup>th</sup> transfer were used for the analysis.

(B) Pathway generated using Ingenuity Pathway analysis (IPA) based on the differentially expressed genes from RNAseq analysis. The pathway corresponds to the top deregulated signaling network, namely, growth factor receptor signaling.

(C) Quantification of phospho AKT and (D) phospho ERK bands from Simple Western in Fig 3B.

(E) Chemiluminescence corresponding to specific detection of phospho AKT at ~60kDa in Fig 3B

(F) Cell viability measured by MTS assay after treatment of murine BaF3, 300-19 and A20 with DMSO, 100nM, 1 $\mu$ M and 10 $\mu$ M of GS-649443 for 2 days.

Suppl. Figure 4

A

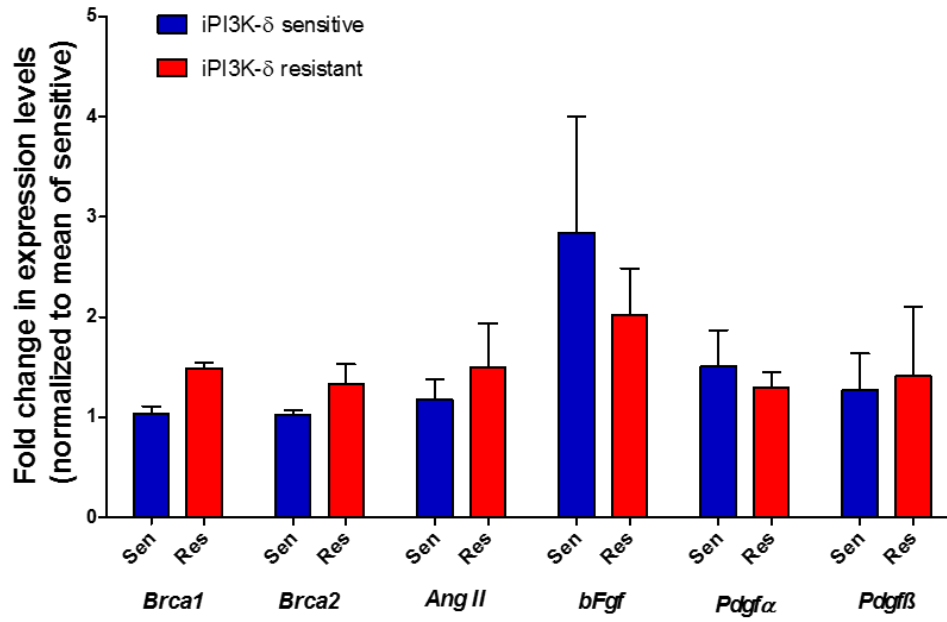

B

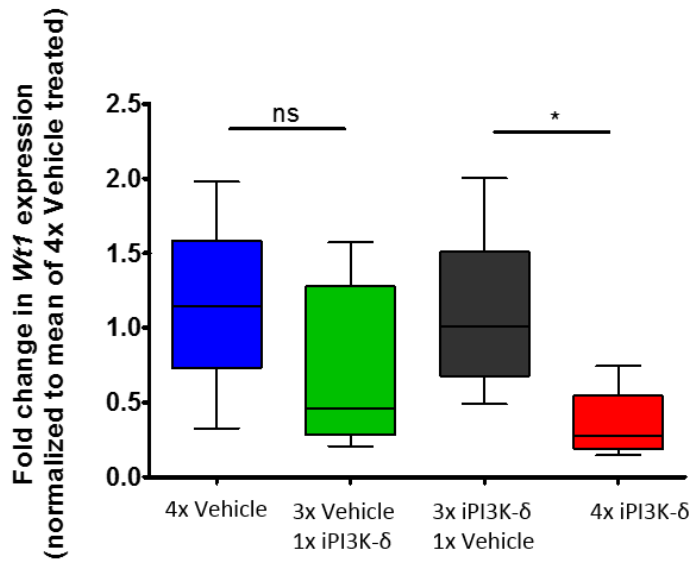

C

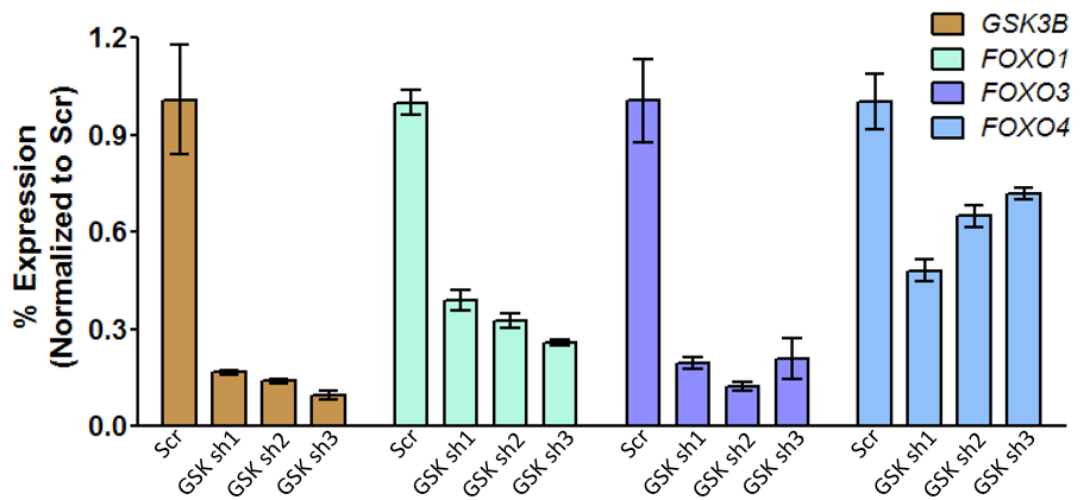

D

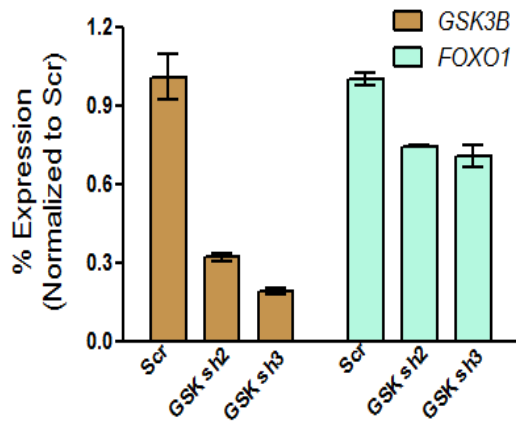

(A) RT-qPCR analysis for expression of genes described to be transcriptional regulators of *Igf1r* in tumors from the 4<sup>th</sup> transfer that were either treated with vehicle (iPI3K- $\delta$  sensitive) or GS-649443 (iPI3K- $\delta$  resistant) across the different treatment rounds.

(B) RT-qPCR analysis for expression levels of the *Wt1*, a transcriptional repressor of *Igf1r* in tumors from the 4<sup>th</sup> transfer. Significant downregulation ( $P=0.0173$ , Mann-Whitney test) was observed in the resistant tumors treated with GS-649443 compared to vehicle treatment.

(C) RT-qPCR analysis for expression levels of *GSK3B*, *FOXO1*, *FOXO3* and *FOXO4* upon knockdown of *GSK3B* in the human NHL cell line JVM2 using 3 different shRNAs (GSK sh1, GSK sh2 and GSK sh3) and (D) in MEC-1 cells using 2 different shRNAs (GSK3 sh2 and GSK3 sh3). No knockdown of *GSK3B* was observed in GSK3 sh1 in Mec1 cells. Expression levels of the genes were normalized to that of scrambled vector (Scr) transduced cells.

Suppl. Figure 5

A

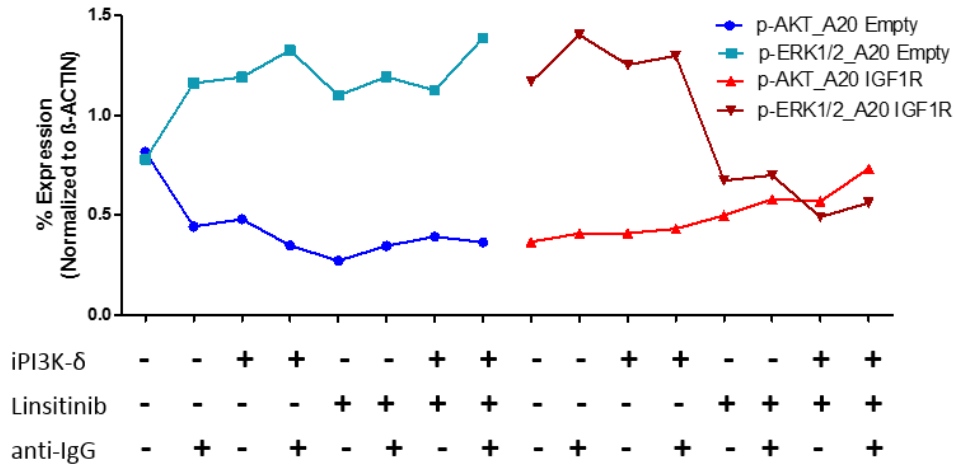

B

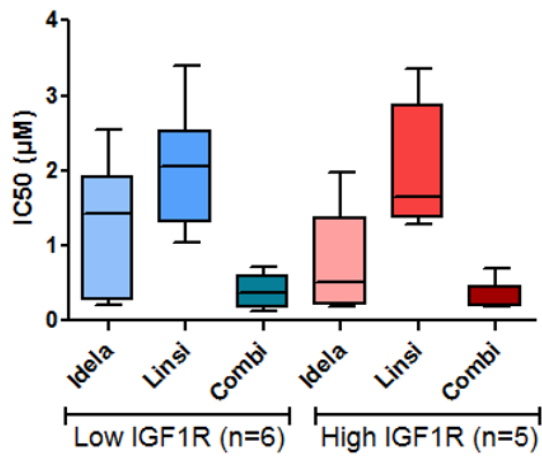

C

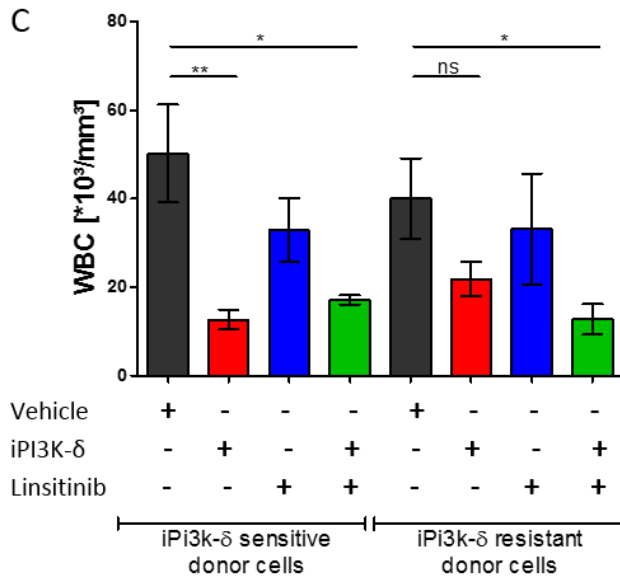

### **Suppl. Figure 5**

(A) Quantification of Fig.6C, were A20 cells, transduced with empty vector or *Igf1r* cDNA, were treated with DMSO, GS-649443 or linsitinib in the presence or absence of anti-IgG stimulation.

p-AKT and p-ERK levels have been quantified and normalized to  $\beta$ -Actin.

(B) Comparison of IC50 from high and low IGF1R expressing samples, (excluding idelalisib treated patient sample) after treatment with idelalisib, linsitinib or the combination for 4 days. Viability assessed using DiOC6/PI staining and FACS.

(C) WBC count after 5 days of treatment from mice transplanted with iPI3K- $\delta$  sensitive or resistant tumors from the 3<sup>rd</sup> round and subsequently treated with either vehicle, GS-649443, linsitinib or the combination of GS-649443 and linsitinib in the 4<sup>th</sup> round. Significant reduction of WBC was observed in the iPI3k- $\delta$  sensitive group treated with GS-649443 (vehicle vs. iPI3K- $\delta$  P=0.0087) or with the combination treatment (vehicle vs. linsitinib+ iPI3K- $\delta$ ; P=0.0173). In the iPI3k- $\delta$  resistant group, combination treatment of GS-649443 and linsitinib led to significant reduction in WBC count (vehicle vs. linsitinib+iPI3K- $\delta$ ; P=0.0173). All P values were obtained from Mann-Whitney test.

Suppl. Figure 6: Graphical abstract

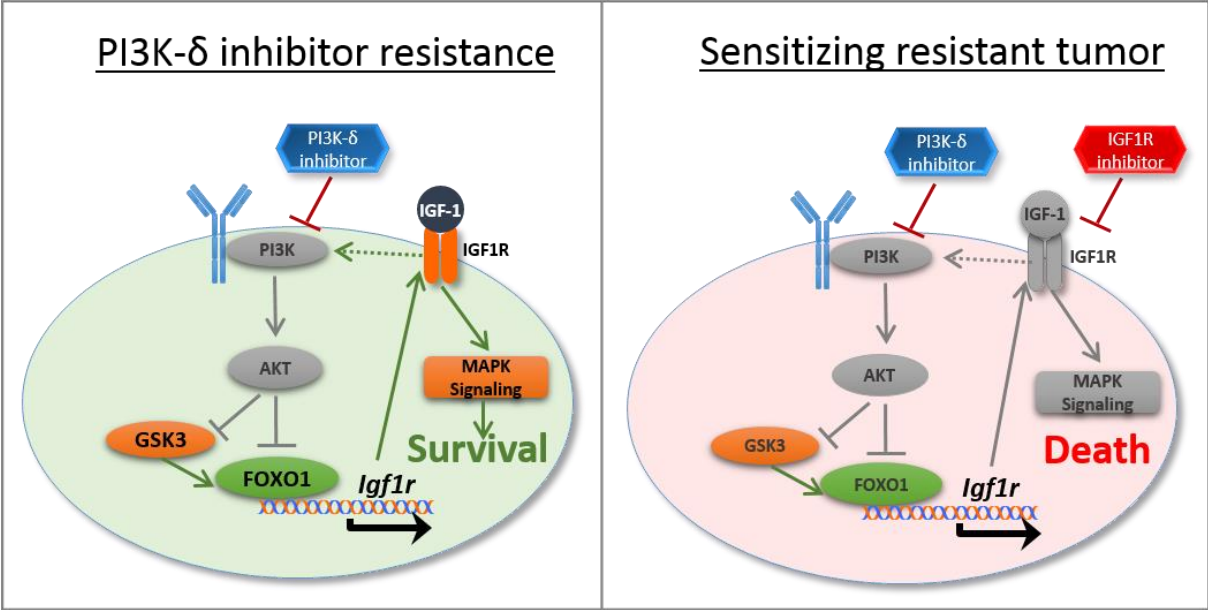

Supplement: 10.1182-2018881029_blood881029-suppl1.pdf [file 10.1182-2018881029_blood881029-suppl1.pdf]
